# Supplementary material for: Quick and facile preparation of ionic liquid functionalized magnetic nanoparticles for the efficient capture of triazole pesticides
Source: Research Square preprint supplement (doi:10.21203/rs.3.rs-7938105/v1), 2025-11-12
Supplement: Supplementary file 1 [file 524791a774ad8c52e8f65493.docx]

Supporting information

**Quick and facile preparation of ionic liquid functionalized magnetic nanoparticles for the efficient capture of triazole pesticides**

Yutong Yu 1, Fenghong Wei 1, Baomin Liu 2, Yuanfei Wu 3, Xiaojia Huang 1*

*1. Fujian Provincial Key Laboratory for Coastal Ecology and Environmental Studies; College of the Environment and Ecology, Xiamen University, Xiamen 361005, China;*

*2.* *College of Ocean and Earth Sciences, Xiamen University, Xiamen 361002, China;*

*3. College of Chemistry and Chemical Engineering, Xiamen University, Xiamen 361005, China*


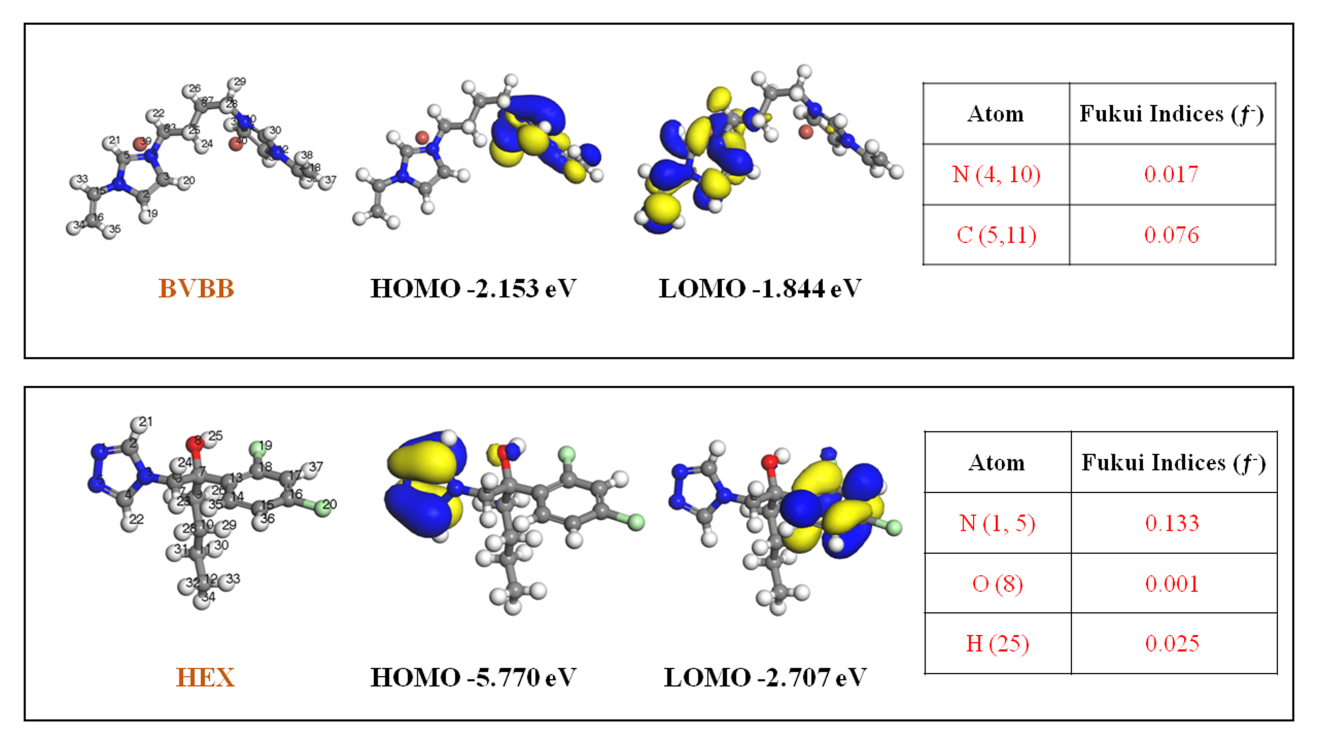


**Fig. S1.** DFT calculation: BVBB and HEX geometry optimization, the energies of HOMO and LUMO, and *f-* values

**Fig. S2.** Investigation about the service life of PFMN





**Fig. S3.** SEM image of PFMN


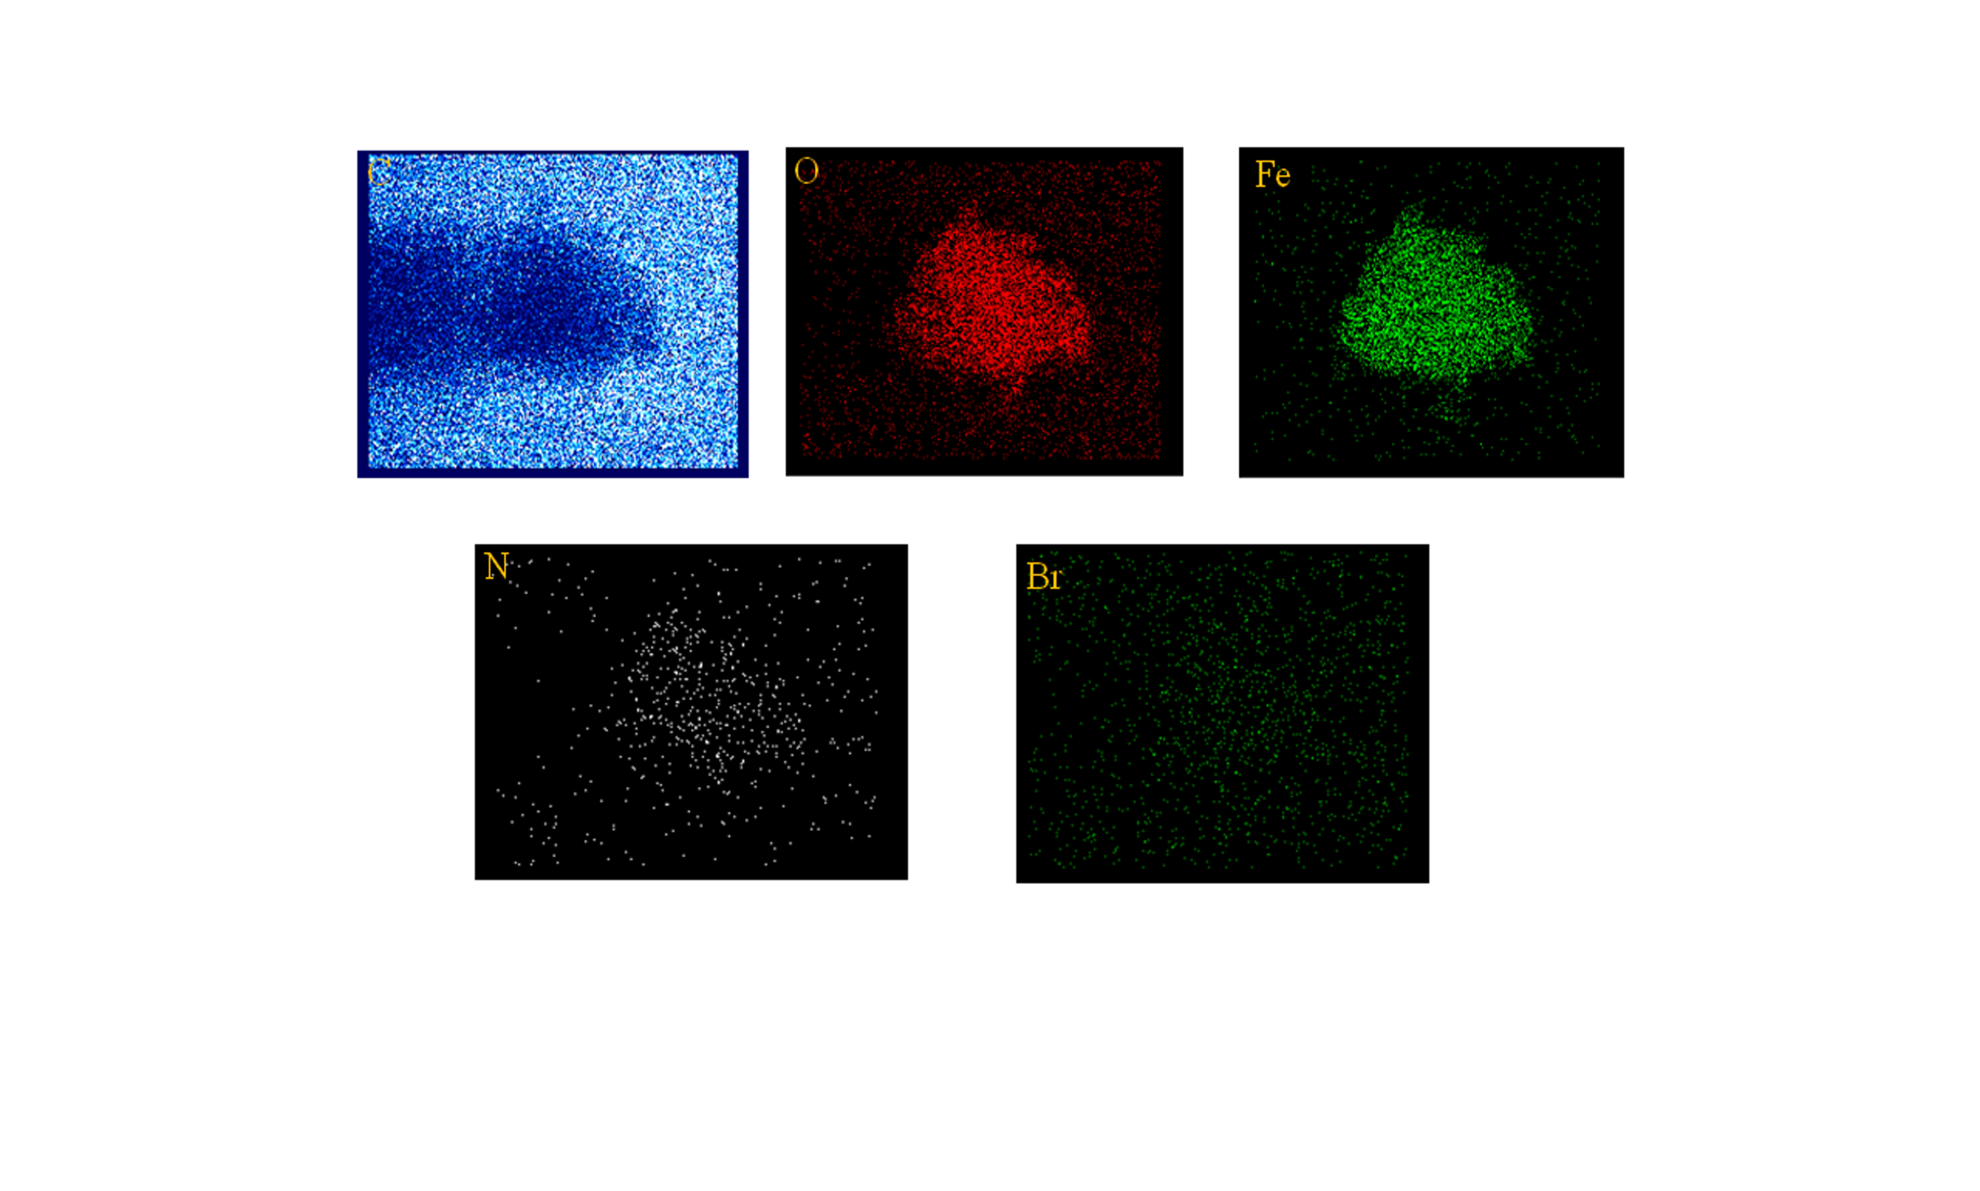


**Fig. S4.** Elemental mappings of C, O, Fe, N and Br in the PFMN

**Optimization of PFMN/MSPE parameters**

*(1) Influence of* *PFMN usage*

Selection of suitable PFMN usage is important because insufficient dosage of adsorbent will result in insufficient adsorption and unsatisfactory capture efficiency. However, excessive usage of adsorbent can waste material and increase analytical cost. In current study, different amounts of PFMN (20.0 mg to 70.0 mg) were utilized to study the effect of adsorbent usage on capture performance. The profiles depicted in Fig. S5a uncover that the adsorption performance rises quickly with the increase of PFMN dosage from 20.0 mg to 60.0 mg, and tend to stabilize from 60.0 mg to 70.0 mg, evidencing that 60 mg PFMN is sufficient to capture the studied TPs. Thus, 60 mg PFMN was utilized in the next experiments.

*(2) Influence of eluent*

Selecting appropriate eluting solvent can enhance desorption performance and prevent residual effect. Considering multiple forces such as H-bonding, dipolar-dipolar, hydrophobic and π-π stacking interactions may contribute to the capture procedure, the binary solution of MeOH and FA was utilized as the eluent. Fig. S5b illustrates the influence of FA content on the eluting performance. As shown, the peak areas of all the analytes increase when the FA content is enhanced from 0.0% to 1.0% (v/v) and decline with the continuous increase of FA dosage. Based on the results, the binary solution of MeOH/FA (99/1.0, v/v) was chosen as the optimal eluting solvent.

*(3) Influences of adsorption and eluting durations*

In current study, different contact time between PFMN and sample solution was investigated to inspect the effect of adsorption period on extraction performance. The variant profiles depicted in Fig. S5c indicate that the peak areas for all the studied TPs rise when the adsorption time is increased from 6.0 min to 10.0 min, and the adsorption remains stable from 10.0 min to 11.0 min. In this connection, 10.0 min adsorption duration was adopted in the following experiments. To release the adsorptive TPs from PFMN completely, enough eluting period should be employed. The variant trends depicted in Fig. S5d reveal that the most favorable desorption time is 4.0 min, confirming the quick mass-transfer procedure of PFMN.

*(4) Influence of* *solution acid-base properties*

When solution acid-base properties are changed, the existing forms of TPs may change. At the same time, the charge properties on the surface of PFMN can also vary accordingly. Thus, the extraction performance of PFMN/MSPE towards the studied TPs strong relies on solution acid-base properties. Sample solutions with different pH value (from 3.0 to 9.0) were prepared to study the influences of acid-base properties on capture performance. As depicted in Fig. S5e, the most suitable solution pH value is 5.0. Apparently, at strongly acidic condition, the PFMN contained positive charges (the isoelectric point was 7.1). In addition, the N atoms in the studied TPs possessed positive charges. Thus, the PFMN and analytes produced electrostatic repulsion which made against the adsorption. With the rise of pH value, de-protonation procedure occurred in the TPs. On one hand, the amount of positive charges in the adsorbent also declined, resulting in the decline of electrostatic repulsion. On the other hand, H-bonding and dipolar-dipolar forces between PFMN and TPs were formed gradually. Under the above factors, the extraction performance enhanced significantly with the increase of solution pH value. It can also be observed from Fig. S5e, with the continuous enhancement of solution pH value, the PFMN and the studied TPs both presented electronegativity gradually, the electrostatic repulsion was formed again, resulting in the decline of extraction performance. As a result, solution pH value was controlled at 5.0 in the following studies.

*(5) Influence of ionic strength*

Ionic strength is an important factor influencing the capture performance because salting-in and salting-out effects co-exist when ionic strength of sample matrix is changed. The salting-in effect favors the analytes dissolve in the solution, while salting-out effect is conducive to the entrapment procedure. The Fig. S5f depicts the influence of ionic strength (adjusted by adding different amounts of NaCl) on the extraction capability. As illustrated, the extraction performance rises with the increase of NaCl concentration from 0.0% to 10.0% (w/v) because the salting-out effect plays the leading role. However, with the continuous enhancement of NaCl content, the salting-in effect overwhelms salting-out effect, resulting in the decline of extraction performance. Hence, 10.0% NaCl (w/v) was added to adjust the salinity of sample in the subsequent studies.


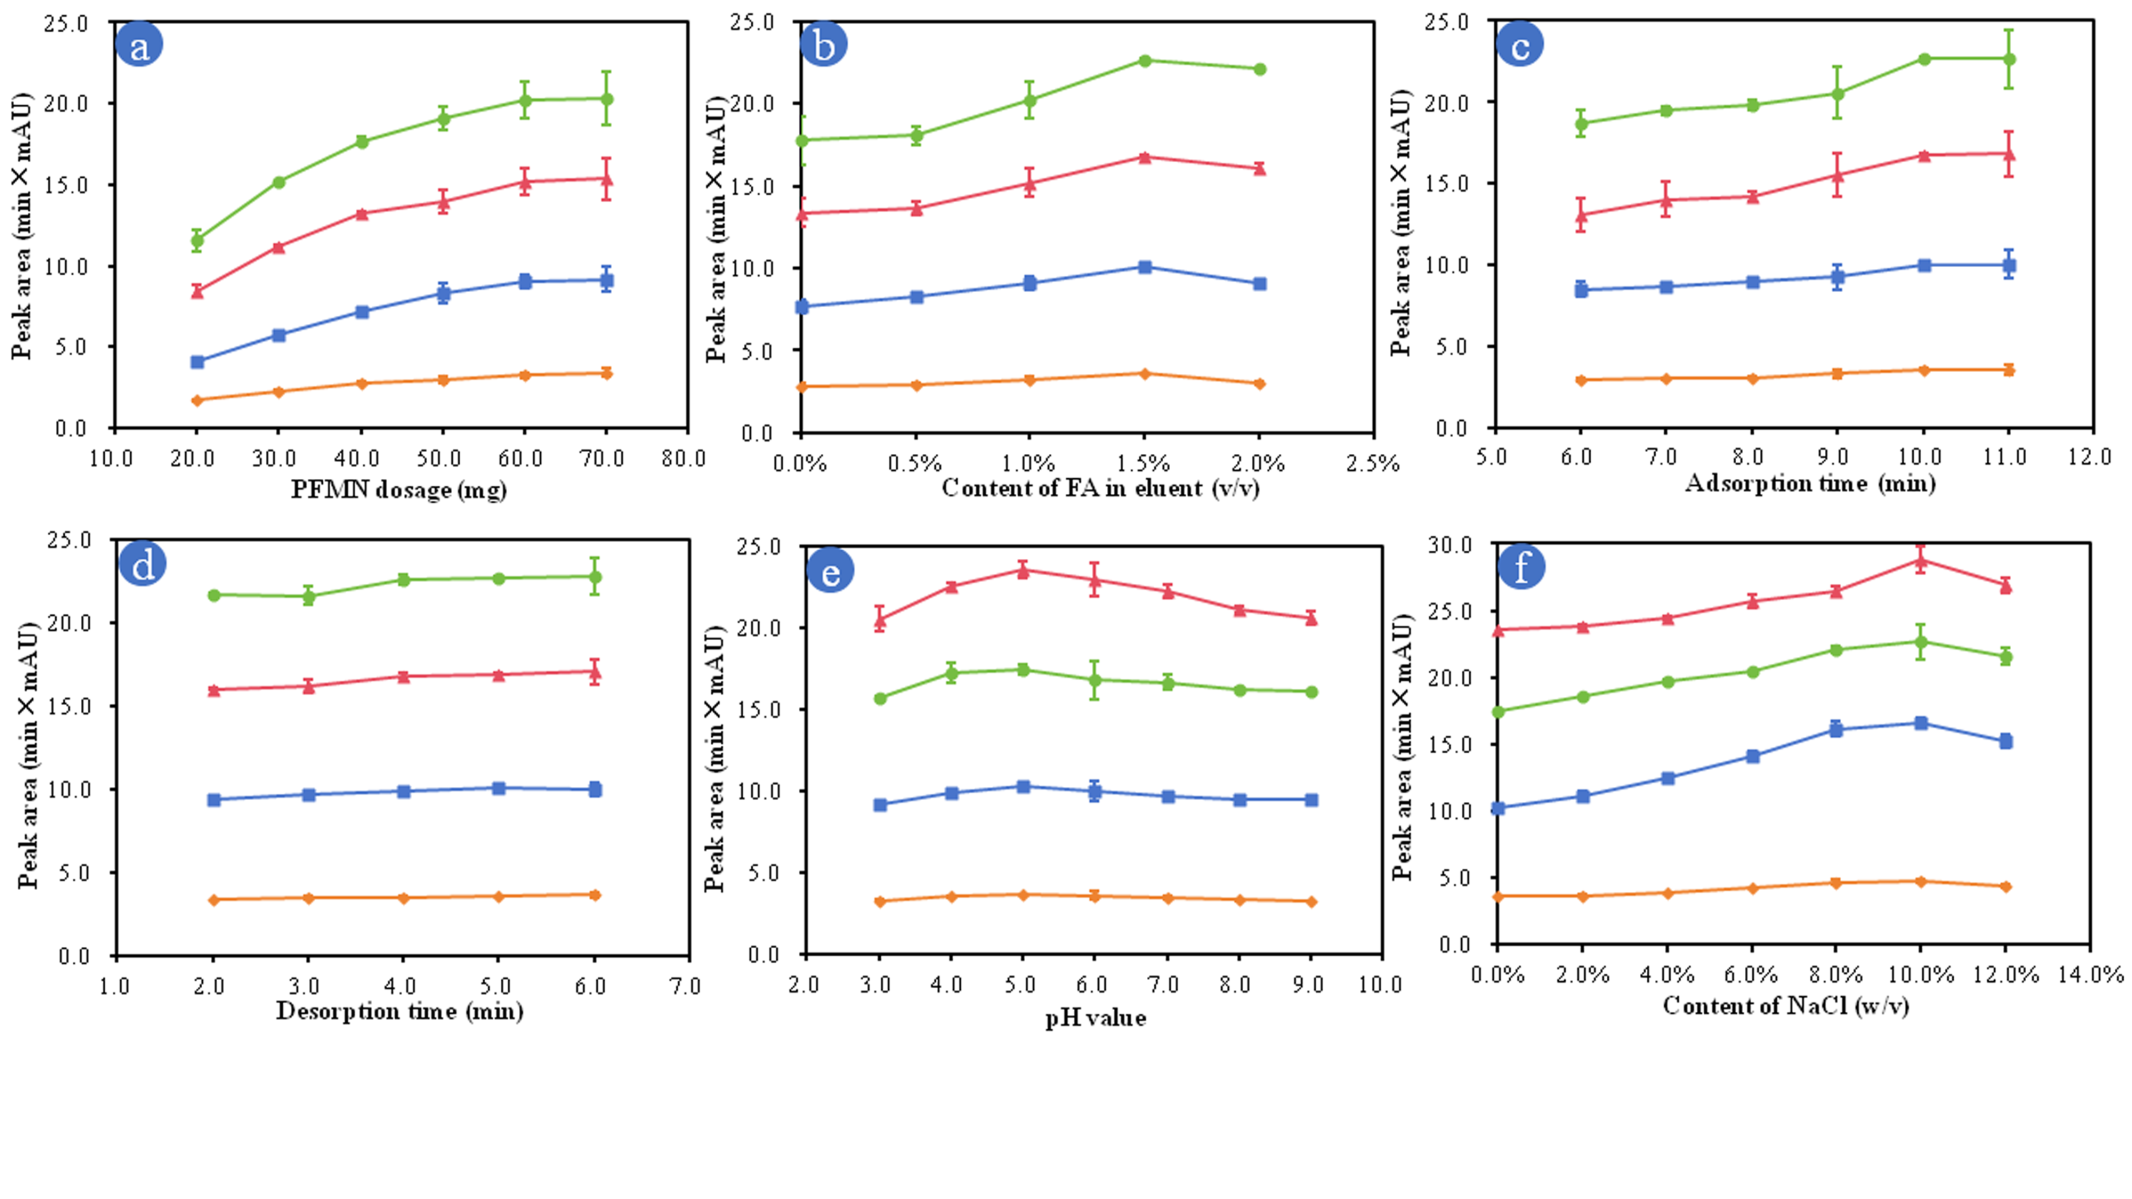


**Fig. S5.** Effects of PFMN usage (a), FA content in eluent (b), adsorption period (c), desorption period (d), sample pH value (e) and ionic strength (f) on the capture performance of PFMN/MSPE towards the studied TPs

Conditions: (a) eluent, 500 μL MeOH/FA (99/1.0, v/v); absorption duration, 10 min; eluting duration, 5 min; sample pH value and ionic strength did not be adjusted. Fortified concentration for each compound was 100 µg/L; (b) PFMN usage, 60 mg; the other conditions can be seen in Fig. S5a; (c) content of FA in eluent, 1.5% (v/v); the other conditions can be seen in Fig. S5b; (d) absorption time, 10 min; the other conditions can be seen in Fig. S5c; (e) desorption time, 4.0 min, solution pH was adjusted with 0.10 mol/L HCl or 0.10 mol/L NaOH; the other conditions can be seen in Fig. S5d; (f) sample pH value, 5.0; the other conditions can be seen in Fig. S5e.

Symbols: **●** HEX; ▲MYC; ■ TRF; ◆TRN.

**Fig. S6.** Curves of adsorption kinetics of the studied TPs on PFMN

Symbols: **●** HEX; **●**MYC; 🞁 TRF; ◼ TRN


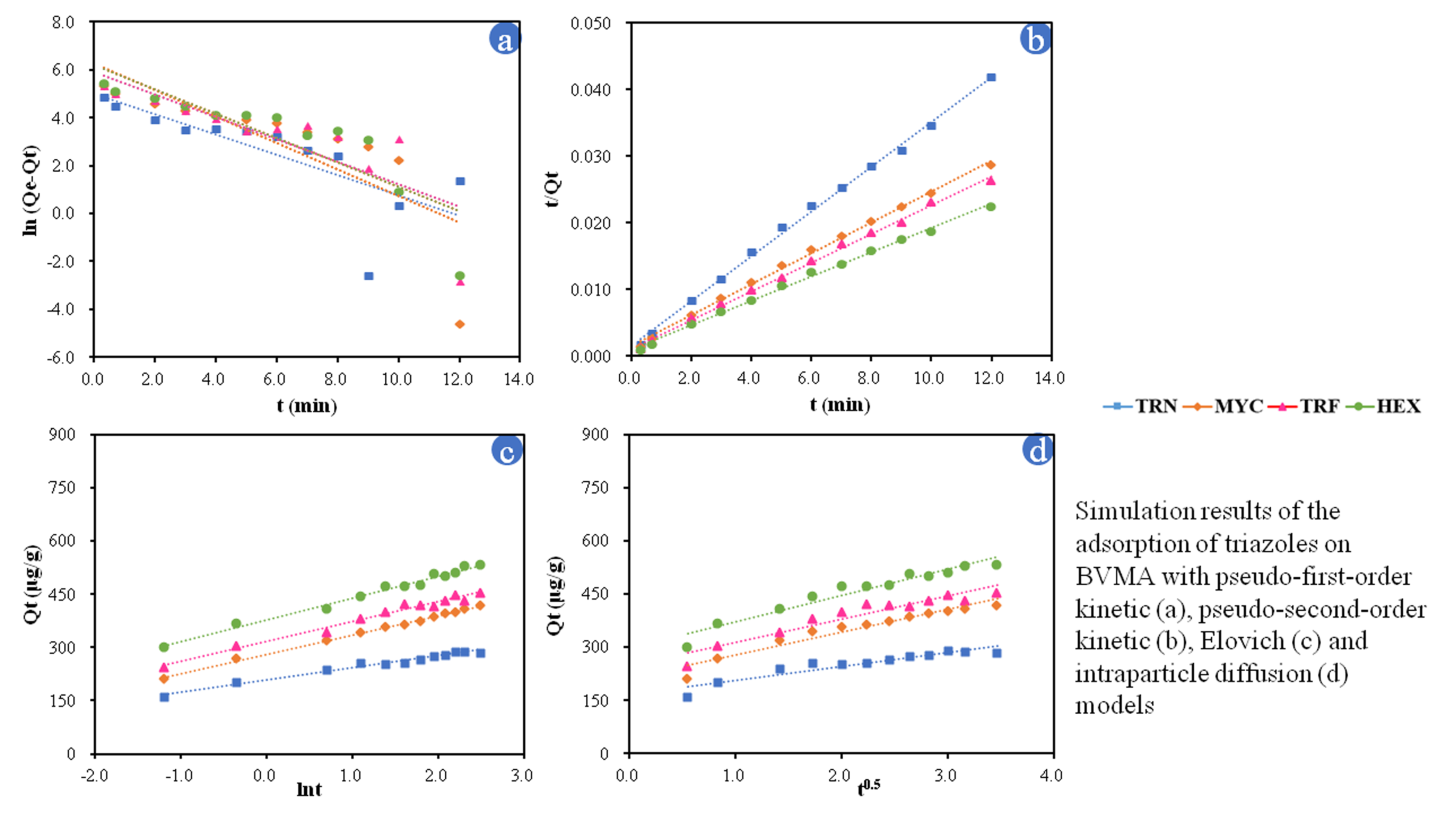


**Fig. S7.** Simulation results of the adsorption of studied TPs on PFMN with pseudo-first-order kinetic (a), pseudo-second-order kinetic (b), Elovich (c) and intraparticle diffusion (d) models

The symbols are the same as in Fig. S6.

**Fig. S8.** Curves of static adsorption of the studied TPs on PFMN

The symbols are the same as in Fig. S6.


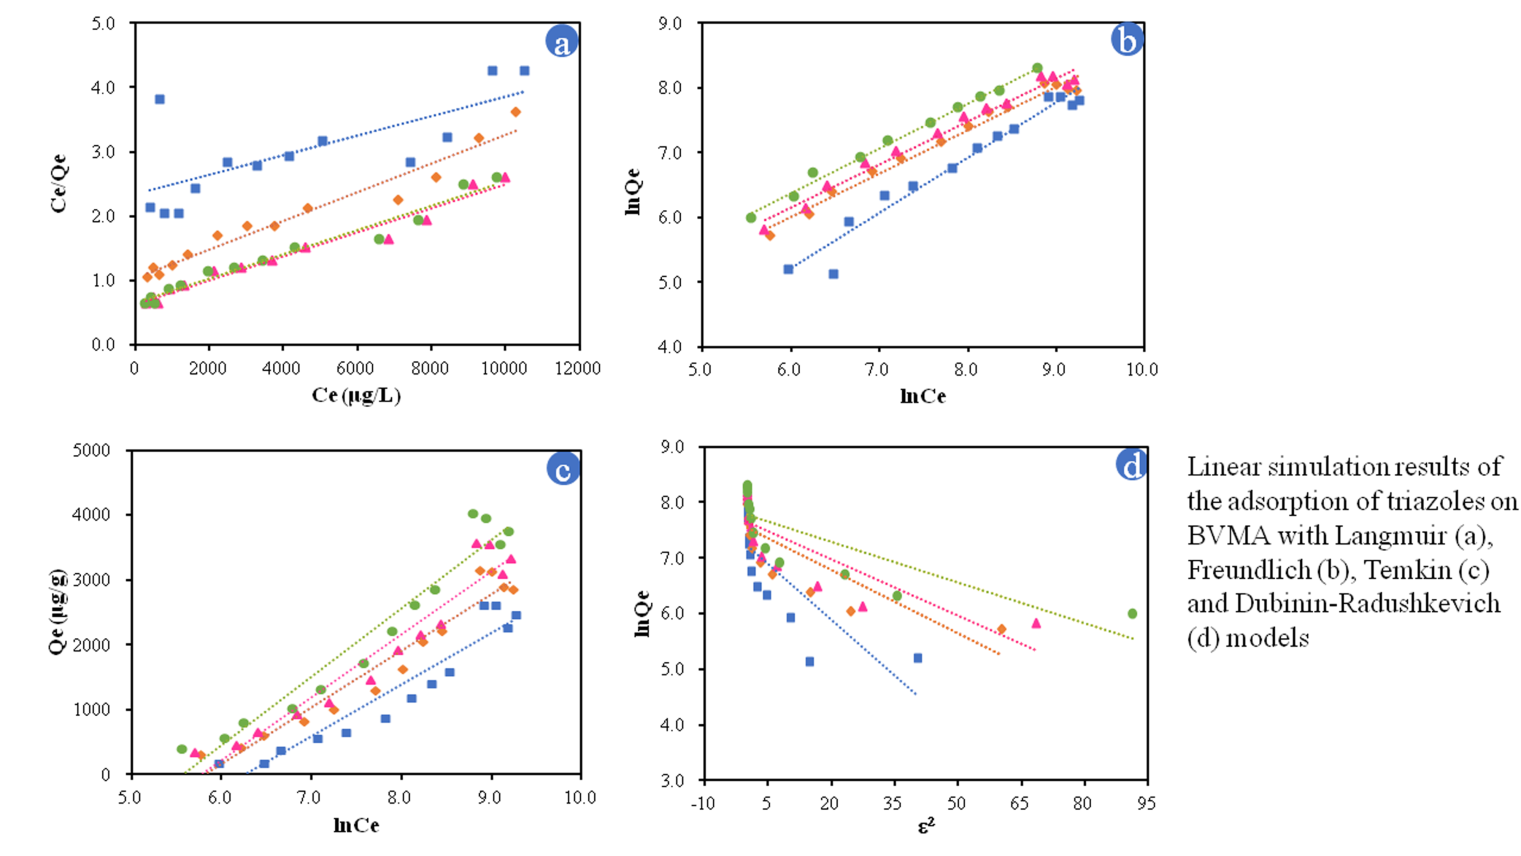


**Fig. S9.** Simulation results of the adsorption of studied TPs on PFMN with Langmuir (a), Freundlich (b), Temkin (c) and Dubinin-Radushkevich (d) models

The symbols are the same as in Fig. S6.


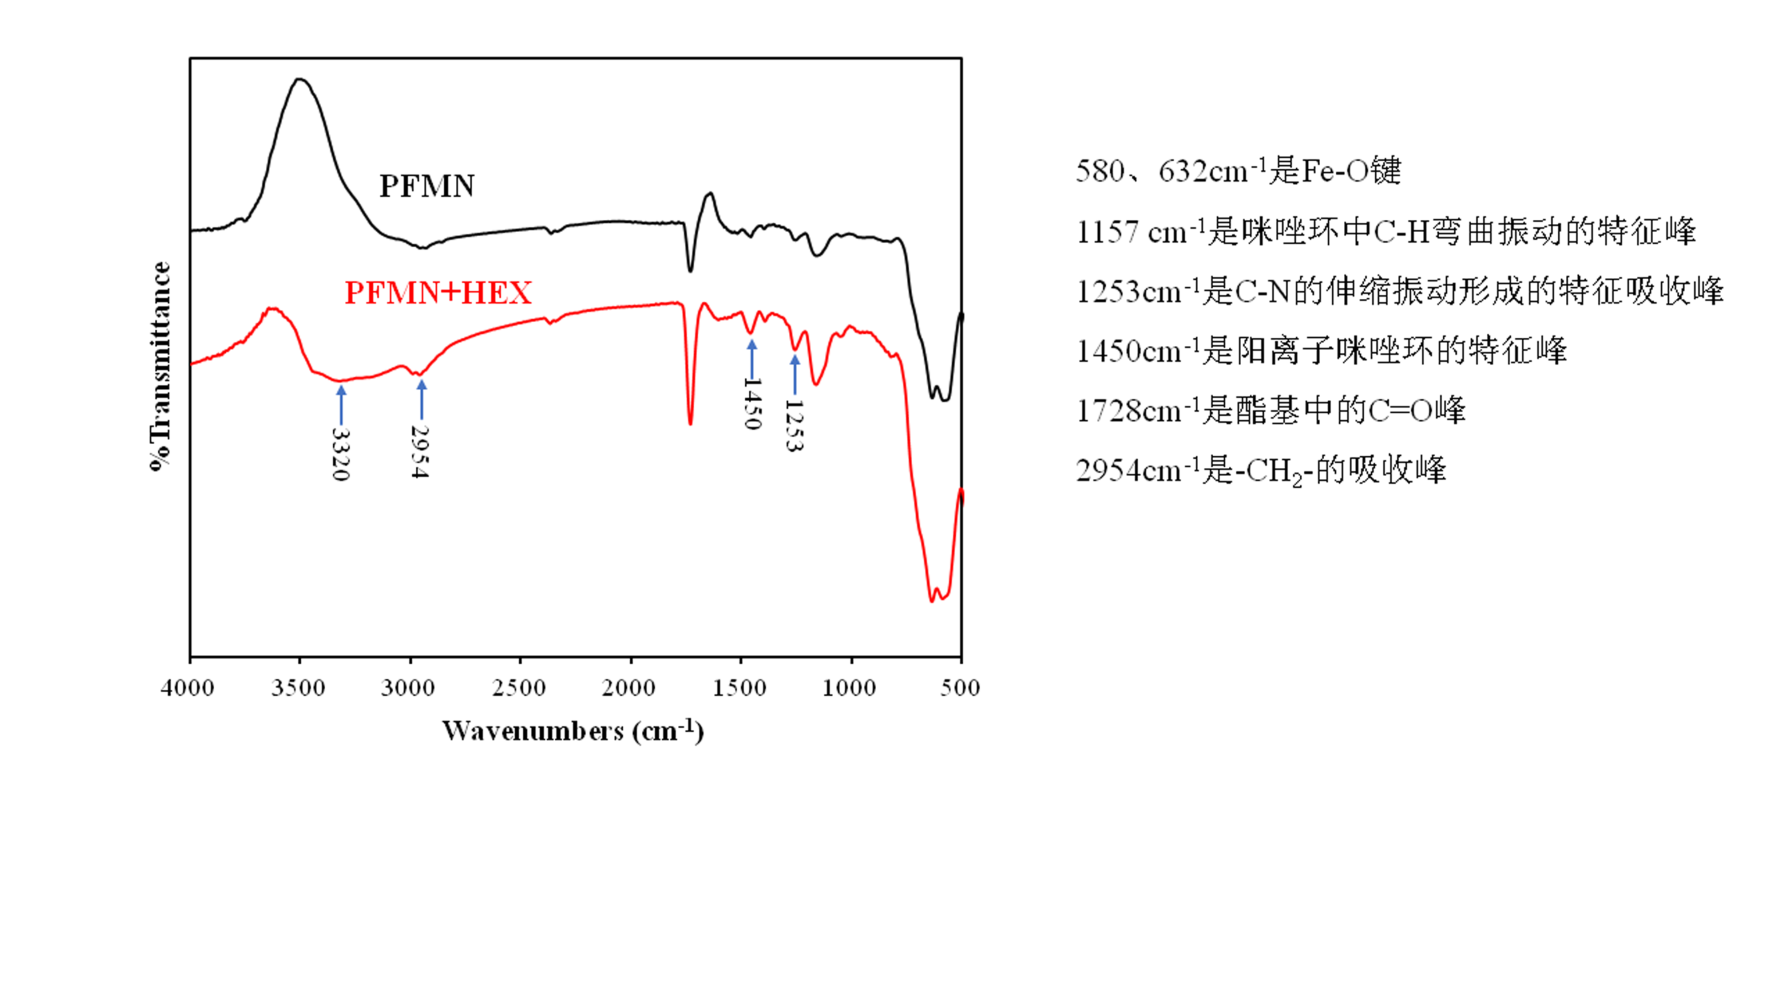


**Fig.** **S10**. FT-IR spectra of PFMN and PFMN+HEX

**TableS1** Isotherm and kinetics models for the adsorption of TPs on PFMN

| Models | Equations | Parameters |
| --- | --- | --- |
| Langmuir adsorption isotherm |  | *Qe* = amount of TPs adsorbed at equilibrium (μg/g)  *Ce* = TPs concentration in solution at equilibrium (μg/L)  *Qm* = maximum adsorbed capacity (μg/g)  *KL*= Langmuir adsorption isotherm constant (L/μg)  *Kf* = equilibrium constants relating to adsorption capacity of Freundlich model  n = Freundlich index  *BT*= the Temkin isotherm constant (KJ/mol)  *KT* = the equilibrium binding constant of the Temkinisotherm (L/mol)  *R* is the ideal gas constant (8.314 J/(mol·K))  *T* is the temperature in Kelvin (K)  *β* = the activity coefficient related to average sorption energy per mole of adsorbate (mol2/J2)  *ɛ* = the Polanyi potential (J/mol) |
| Freundlich adsorption isotherm |  |
| Temkin |  |
| Dubinin-Radushkevich |  |
| Pseudo-first-order kinetic |  | *Qt*= amount of TPs adsorbed at any time *t* (μg/g)  *Qe* = amount of TPs adsorbed at equilibrium (μg/g)  *k1* = pseudo-first-order rate constant (min-1)  *k2* = pseudo-second-order rate constant (g/(μg·min))  *α* = the adsorption rate constant (μg/(g·min))  *β* = the desorption rate constant (g/μg)  kipd = the intraparticle diffusion rate constant (μg/(g·min-0.5))  *C* is a constant related to the thickness of the boundary layer of the adsorbent (μg/L) |
| Pseudo-second-order kinetic |  |
| Elovich |  |
| Intraparticle diffusion |  |

**Table S2** Chemical properties of the studied TPs

| **Compounds** | | **Molecular formula** | **Molecular mass** | **Chemical structures** | **Log*Kow* a** | **p*Ka* b** |
| --- | --- | --- | --- | --- | --- | --- |
| **Full name** | **Abbreviation** |
| Triadimenol | TRN | C14H18ClN3O2 | 295.76 |  | 3.04 | 13.29 |
| Myclobutanil | MYC | C15H17ClN4 | 288.78 |  | 2.82 | 2.30 |
| Triadimefon | TRF | C14H16ClN3O2 | 293.75 |  | 2.77 | 1.41 |
| Hexaconazole | HEX | C14H17Cl2N3O | 314.21 |  | 3.66 | 12.26 |

a: <http://www.chemspider.com/>

b: <https://chem.nlm.nih.gov/chemidplus/>

**Table S3** Adsorption kinetic parameters of PFMN/MSPE towards the studied TPs

| Models | Parameters | TRN | MYC | TRF | HEX |
| --- | --- | --- | --- | --- | --- |
| Pseudo first-order | *Qm*(μg∙g-1) | 146.6 | 513.7 | 368.1 | 497.3 |
| *k1*(min-1) | 4.988 | 0.5502 | 0.4679 | 0.5112 |
| *R2* | 0.6018 | 0.6279 | 0.6764 | 0.7468 |
|  |  |  |  |  |  |
| Pseudo second-order | *Qm*(μg∙g-1) | 294.1 | 434.8 | 454.5 | 555.6 |
| *k2*(g∙(μg∙min)-1) | 7.225×10-3 | 3.527×10-3 | 4.030×10-3 | 2.950×10-3 |
| *R2* | 0.9977 | 0.9971 | 0.9972 | 0.9967 |
|  |  |  |  |  |  |
| Elovich | *α* (μg∙g-1∙min-1) | 1.609×104 | 9.541×103 | 1.621×104 | 2.855×104 |
| *β* (g∙μg-1) | 0.02948 | 0.01835 | 0.01790 | 0.01623 |
| *R2* | 0.9770 | 0.9967 | 0.9800 | 0.9867 |
|  |  |  |  |  |  |
| Intraparticle diffusion | *kipd*(μg/(g·min-0.5)) | 39.56 | 64.67 | 65.84 | 73.79 |
| *C* (μg/L) | 167.6 | 212.5 | 247.1 | 298.8 |
| *R2* | 0.8833 | 0.9328 | 0.9044 | 0.9401 |

**Table S4** Isothermal adsorption parameters of PFMN/MSPE towards the studied TPs

| Models | Parameters | TRN | MYC | TRF | HEX |
| --- | --- | --- | --- | --- | --- |
| Langmuir | *Qm*(μg∙g-1) | 5000 | 5000 | 5000 | 5000 |
| *KL* | 8.554×10-5 | 1.934×10-4 | 3.158×10-4 | 3.056×10-4 |
| R2 | 0.5276 | 0.9547 | 0.9671 | 0.9674 |
|  |  |  |  |  |  |
| Freundlich | *KF* | 1.109 | 7.270 | 8.754 | 9.293 |
| *n* | 1.174 | 1.491 | 1.506 | 1.447 |
| *R2* | 0.9614 | 0.9799 | 0.9783 | 0.9924 |
|  |  |  |  |  |
| Temkin | *KT* | 1.902×10-3 | 2.965×10-3 | 3.141×10-3 | 3.882×10-3 |
| *BT*(KJ∙mol) | 3.103 | 2.836 | 2.561 | 2.403 |
| *R2* | 0.9045 | 0.9407 | 0.9340 | 0.9212 |
|  |  |  |  |  |
| Dubinin-Radushkevich | *Qm*(μg∙g-1) | 1.359×103 | 1.865×103 | 2.077×103 | 1.983×103 |
| *E* (KJ∙mol) | 2.742 | 3.637 | 3.863 | 4.834 |
| *β* (mol2/J2) | 0.0665 | 0.0378 | 0.0335 | 0.0214 |
| *R2* | 0.6081 | 0.6646 | 0.6632 | 0.6734 |

| Samples | Spiked | Detected (μg/L) / Recoveries (%RSD, n = 3) | | | | | | | |
| --- | --- | --- | --- | --- | --- | --- | --- | --- | --- |
| (μg/L or μg/kg) | TRN |  | MYC |  | TRF |  | HEX |  |
| Farmland water | 0.0 | ND |  | 0.13 |  | ND |  | 0.19 |  |
|  | 1.0 | 0.89 | 89.0 (5.8) | 1.03 | 89.6 (9.7) | 1.16 | 116 (7.7) | 1.08 | 88.9 (9.5) |
|  | 10.0 | 11.6 | 116 (5.4) | 10.8 | 107 (5.8) | 10.3 | 103 (8.3) | 11.8 | 116 (3.9) |
|  | 100 | 107 | 107 (2.4) | 107 | 107 (3.1) | 112 | 112 (4.2) | 106 | 106 (5.1) |
| Lake water | 0.0 | ND |  | ND |  | 0.050 |  | ND |  |
|  | 1.0 | 0.87 | 87.0 (4.8) | 1.01 | 101 (7.2) | 1.01 | 96.2 (4.7) | 0.91 | 91.0 (5.3) |
|  | 10.0 | 10.8 | 108 (6.4) | 10.7 | 107 (4.9) | 10.9 | 109 (2.3) | 11.7 | 117 (1.4) |
|  | 100 | 94.5 | 94.5 (2.7) | 95.2 | 95.2 (4.0) | 100 | 100 (2.5) | 96.0 | 96.0 (3.2) |
| River water | 0.0 | ND |  | 0.21 |  | 0.085 |  | 0.063 |  |
|  | 1.0 | 1.19 | 119 (2.4) | 1.04 | 101 (6.0) | 1.14 | 109 (4.1) | 1.19 | 116 (3.7) |
|  | 10.0 | 11.8 | 118 (2.8) | 12.1 | 119 (1.2) | 11.8 | 117 (1.2) | 11.8 | 118 (3.1) |
|  | 100 | 94.6 | 94.6 (7.5) | 95.3 | 95.1 (6.7) | 99.2 | 99.2 (7.5) | 92.9 | 92.9 (6.3) |
| Fruit juice 1 | 0.0 | ND |  | ND |  | ND |  | 0.054 |  |
|  | 1.0 | 1.04 | 104 (8.2) | 0.92 | 92.0 (4.1) | 0.97 | 97.0 (8.1) | 0.96 | 90.6 (9.6) |
|  | 10.0 | 8.49 | 84.9 (8.6) | 10.1 | 101 (7.8) | 11.0 | 110 (9.9) | 9.50 | 94.5 (8.6) |
|  | 100 | 90.0 | 90.0 (3.2) | 94.3 | 94.3 (6.1) | 96.1 | 96.1 (2.4) | 88.4 | 88.3 (2.6) |
| Fruit juice 2 | 0.0 | ND |  | ND |  | ND |  | ND |  |
|  | 1.0 | 0.97 | 97.0 (5.8) | 1.10 | 110 (10) | 0.90 | 90.0 (3.9) | 0.99 | 99.2 (7.7) |
|  | 10.0 | 8.34 | 83.4 (0.90) | 11.1 | 111 (9.7) | 8.04 | 80.4 (5.7) | 8.12 | 81.2 (5.3) |
|  | 100 | 88.0 | 88.0 (4.5) | 101 | 101 (4.4) | 91.5 | 91.5 (4.1) | 83.4 | 83.4 (5.0) |

**Table S5** Results of determination and spiked recoveries of developed method for the analysis of TPs in water and juice samples

**Table S6** Confirmatory study of the determination of TPs in water and juices

| Samples | Methods | Concentration (μg/L) / (%RSD, n=3) | | | |
| --- | --- | --- | --- | --- | --- |
| TRN | MYC | TRF | HEX |
| Sewage Treatment Plant Effluent | PFMN/MSPE-HPLC/DAD | 0.18 (7.8) | 0.22 (6.0) | 0.23 (1.9) | ND |
| SPE-HPLC/MS a | 0.19 (3.6) | 0.20 (3.7) | 0.24 (5.2) | ND |
| Pomelo Juice | PFMN/MSPE-HPLC/DAD | ND | ND | 0.19 (4.1) | 0.25 (0.89) |
| SPME-HPLC/DAD b | ND | ND | 0.18 (4.3) | 0.27 (3.7) |

a: Anal Bioanal Chem (2012) 403:2997-3011; b: Anal. Methods, 2013, 5, 2565-2571.

**The suppliers of chemicals**

1,4-Bis(3-vinylimidazolium-1-yl) butane bromide (BVBB, 98.0%), ethylene dimethacrylate (EDMA, 98%) and 2,2′-azobis (2-methylpropionitrile) (AIBN, 97%) obtained from obtained from Alfa aesar Ltd (Tianjin, China). Propanol (99.5%), 1,4-butanediol (BDO, 99.0%), iron (III) chloride hexahydrate (FeCl3∙6H2O, 99%), iron (II) chloride tetrahydrate (FeCl2∙4H2O, 98%), ammonia (28%, v/v), formic acid (FA, 97%) and NaCl (99.5%) were supplied by Macklin Inc. (Shanghai, China). The HPLC grade methanol (MeOH) and acetonitrile (ACN) were purchased from Thermo Fisher Sci. Ltd. (Sichuan, China). Ultrapure water used in the study was prepared from Create Fun SP-D2 laboratory ultra-pure water system (Sichuan, China).

**Instrumental information**

HPLC analyses were performed on a LC chromatographic system (Shimadzu, Japan) equipped with a binary pump (LC-20AB) and a diode array detector (SPD-M20 A). A RE3725i automatic sample injector coupled with a 20 μL loop (Rheodyne, Cotati, CA, USA) was utilized to conduct sample injection.

The morphology, size and element distribution of PFMN were characterized by transmission electron microscopy (TEM, JEM-1400, Japan), scanning electron microscope (SEM, Zeiss supra 55, German) equipped with energy dispersive spectrometer (EDS, OXFORD X-MaxN, England). The Fourier transform infrared spectrometer (FT-IR, Avatar-360, Japan) and vibrating sample magnetometer (VSM, PPMS-9, USA) were used to analyze the chemical structure and magnetic property of prepared PFMN. Zeta potential was investigated by a Malvern Zetasizer Nano ZS Particle and Zeta Potential Analyzer (MPT-2, Malvern, UK). The surface areas of PMFN were measured by BET technique (Micromeritics TriStar II 3020, USA).

**Detailed procedure about adsorption experiments**

The adsorption kinetic studies were examined by adding 30 mg PFMN into 50 mL solution containing the studied TPs (the concentration was 500 µg/L for each analyte), and the sample was shaken at 240 rpm in a thermostat oscillator for different time (0.30, 0.70, 2.0, 3.0, 4.0, 5.0, 6.0, 7.0, 8.0, 9.0, 10, 11 and 12 min). After adsorption, the sample and the nanoparticles were magnetically separated, and the supernatant was filtrated through a 0.45 μm PTFE membrane for HPLC/DAD measurement.

Equilibrium adsorption studies were performed by using a series of initial concentrations (500, 750, 1000, 1500, 2000, 3000, 4000, 5000, 6000, 7000, 8000, 9000 and 10000 μg/L). All experiments were carried out in 50 mL solution and 30 mg PFMN were employed. The adsorption was conducted at 240 rpm for 10.0 min. After reaching adsorption equilibrium, the contents of TPs in the sample were analyzed by HPLC/DAD.

The adsorption capacities of the studied TPs on the PFMN were calculated according to equations (1) and (2):

The adsorption capacities of analytes on PFMN were calculated as follows:

(1)

(2)

Where *Qt* and *Qe* were the amounts of analytes adsorbed by PFMN at time *t* and equilibrium, respectively; *C0*, *Ct* and *Ce* (μg/L) were the concentrations of the studied TPs at initial stage, time *t* and equilibrium, respectively; *V* (L) and *m* (g) were the sample volume and amount of adsorbents, respectively.

**Collection of environmental water and juice samples**

River water was gathered from Jiulong river (Zhangzhou, China), lake and waste waters were gathered in the campus of Xiamen University (Xiamen, China). Farmland water was collected in Maolin village in Xiamen city. Fruit juice samples with different brands were bought from supermarket in Xiamen city.
